# Supplementary material for: eXclusionarY: 10 years later, where are the sex chromosomes in GWASs?
Source: PubMed Central journal article supplement — Am J Hum Genet. 2023 Jun 1;110(6):903–12. doi: 10.1016/j.ajhg.2023.04.009 (PMC10257007; doi:10.1016/j.ajhg.2023.04.009), 2023-06-01

**The American Journal of Human Genetics, Volume 110**

**Supplemental information**

**eXclusionarY: 10 years later, where  
are the sex chromosomes in GWASs?**

**Lei Sun, Zhong Wang, Tianyuan Lu, Teri A. Manolio, and Andrew D. Paterson**

**Figure S1. Total number of studies reporting at least one genome-wide significant finding (p-value < 5 x 10<sup>-8</sup>) over time, stratified by chromosome and year, from the NHGRI-EBI GWAS Catalog.** Genetic associations were indexed by unique PubMed IDs. Studies reporting associations with multiple traits were only counted once.

**Figure S2. Average number of studies per Mb reporting at least one genome-wide significant finding (p-value < 5 x 10<sup>-8</sup>) over time, stratified by chromosome and year, from the NHGRI-EBI GWAS Catalog.** Genetic associations were indexed by unique PubMed IDs. Studies reporting associations with multiple traits were only counted once.

**Supplemental Data S1.** List of GWAS summary statistics available in the NHGRI-EBI GWAS catalog from publications in 2021 examined to determine whether they contain results for X and Y chromosomes. The columns contain the following information:

**Column A;** PubMed ID

**Column B:** Ftp Link to NHGRI-EBI GWAS catalog summary statistics for one trait selected from each PubMed ID for examination of summary statistics.

**Column C:** Number of GWAS summary statistics present within each PubMed ID.

**Column D:** Indicator whether results were present for X chromosome SNPs: 0=No, 1=Yes

**Column E:** Indicator whether results were present for Y chromosome SNPs: 0=No, 1=Yes

**Supplemental Data S2.** Reporting standards for entries in the NHGRI-EBI GWAS catalog downloaded on 2020-03-08 where the study had reported one or more X chromosome loci (p<5

x 10-8). Detailed information about the column descriptions are provided in the Header Description tab.

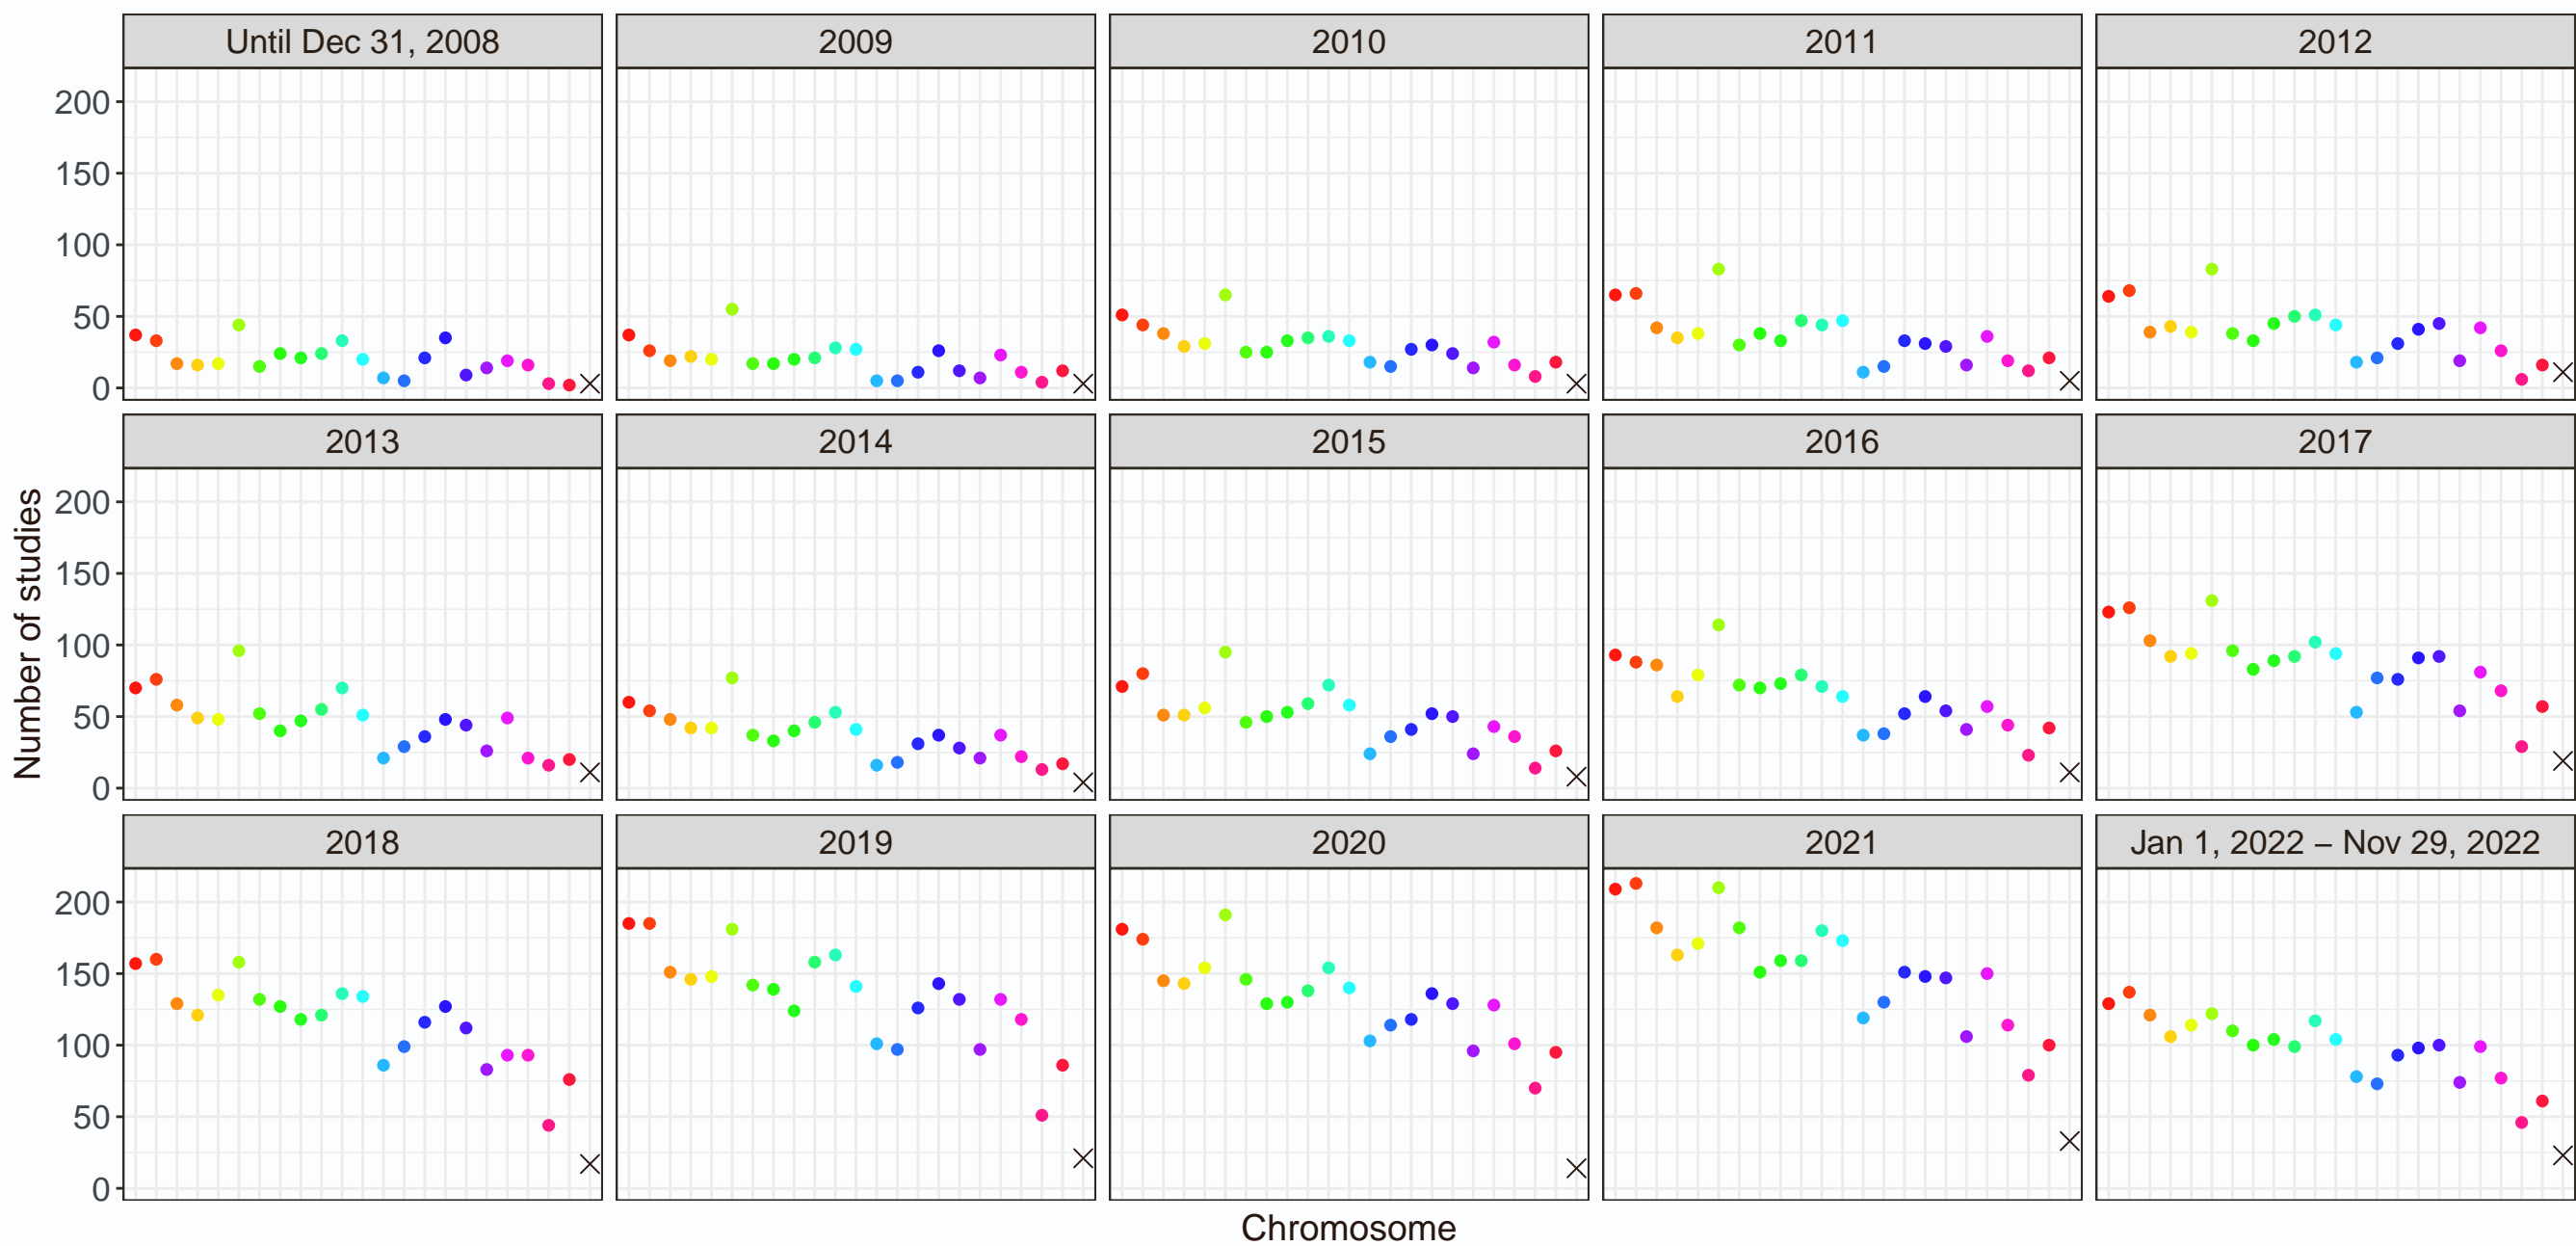

- chr1 (248 Mb)    • chr2 (243 Mb)    • chr3 (201 Mb)    • chr4 (194 Mb)    • chr5 (182 Mb)    • chr6 (172 Mb)    • chr7 (161 Mb)    • chr8 (146 Mb)
- chr9 (151 Mb)    • chr10 (135 Mb)    • chr11 (135 Mb)    • chr12 (133 Mb)    • chr13 (114 Mb)    • chr14 (101 Mb)    • chr15 (100 Mb)    • chr16 (96 Mb)
- chr17 (84 Mb)    • chr18 (81 Mb)    • chr19 (62 Mb)    • chr20 (66 Mb)    • chr21 (45 Mb)    • chr22 (51 Mb)    • chrX (154 Mb)

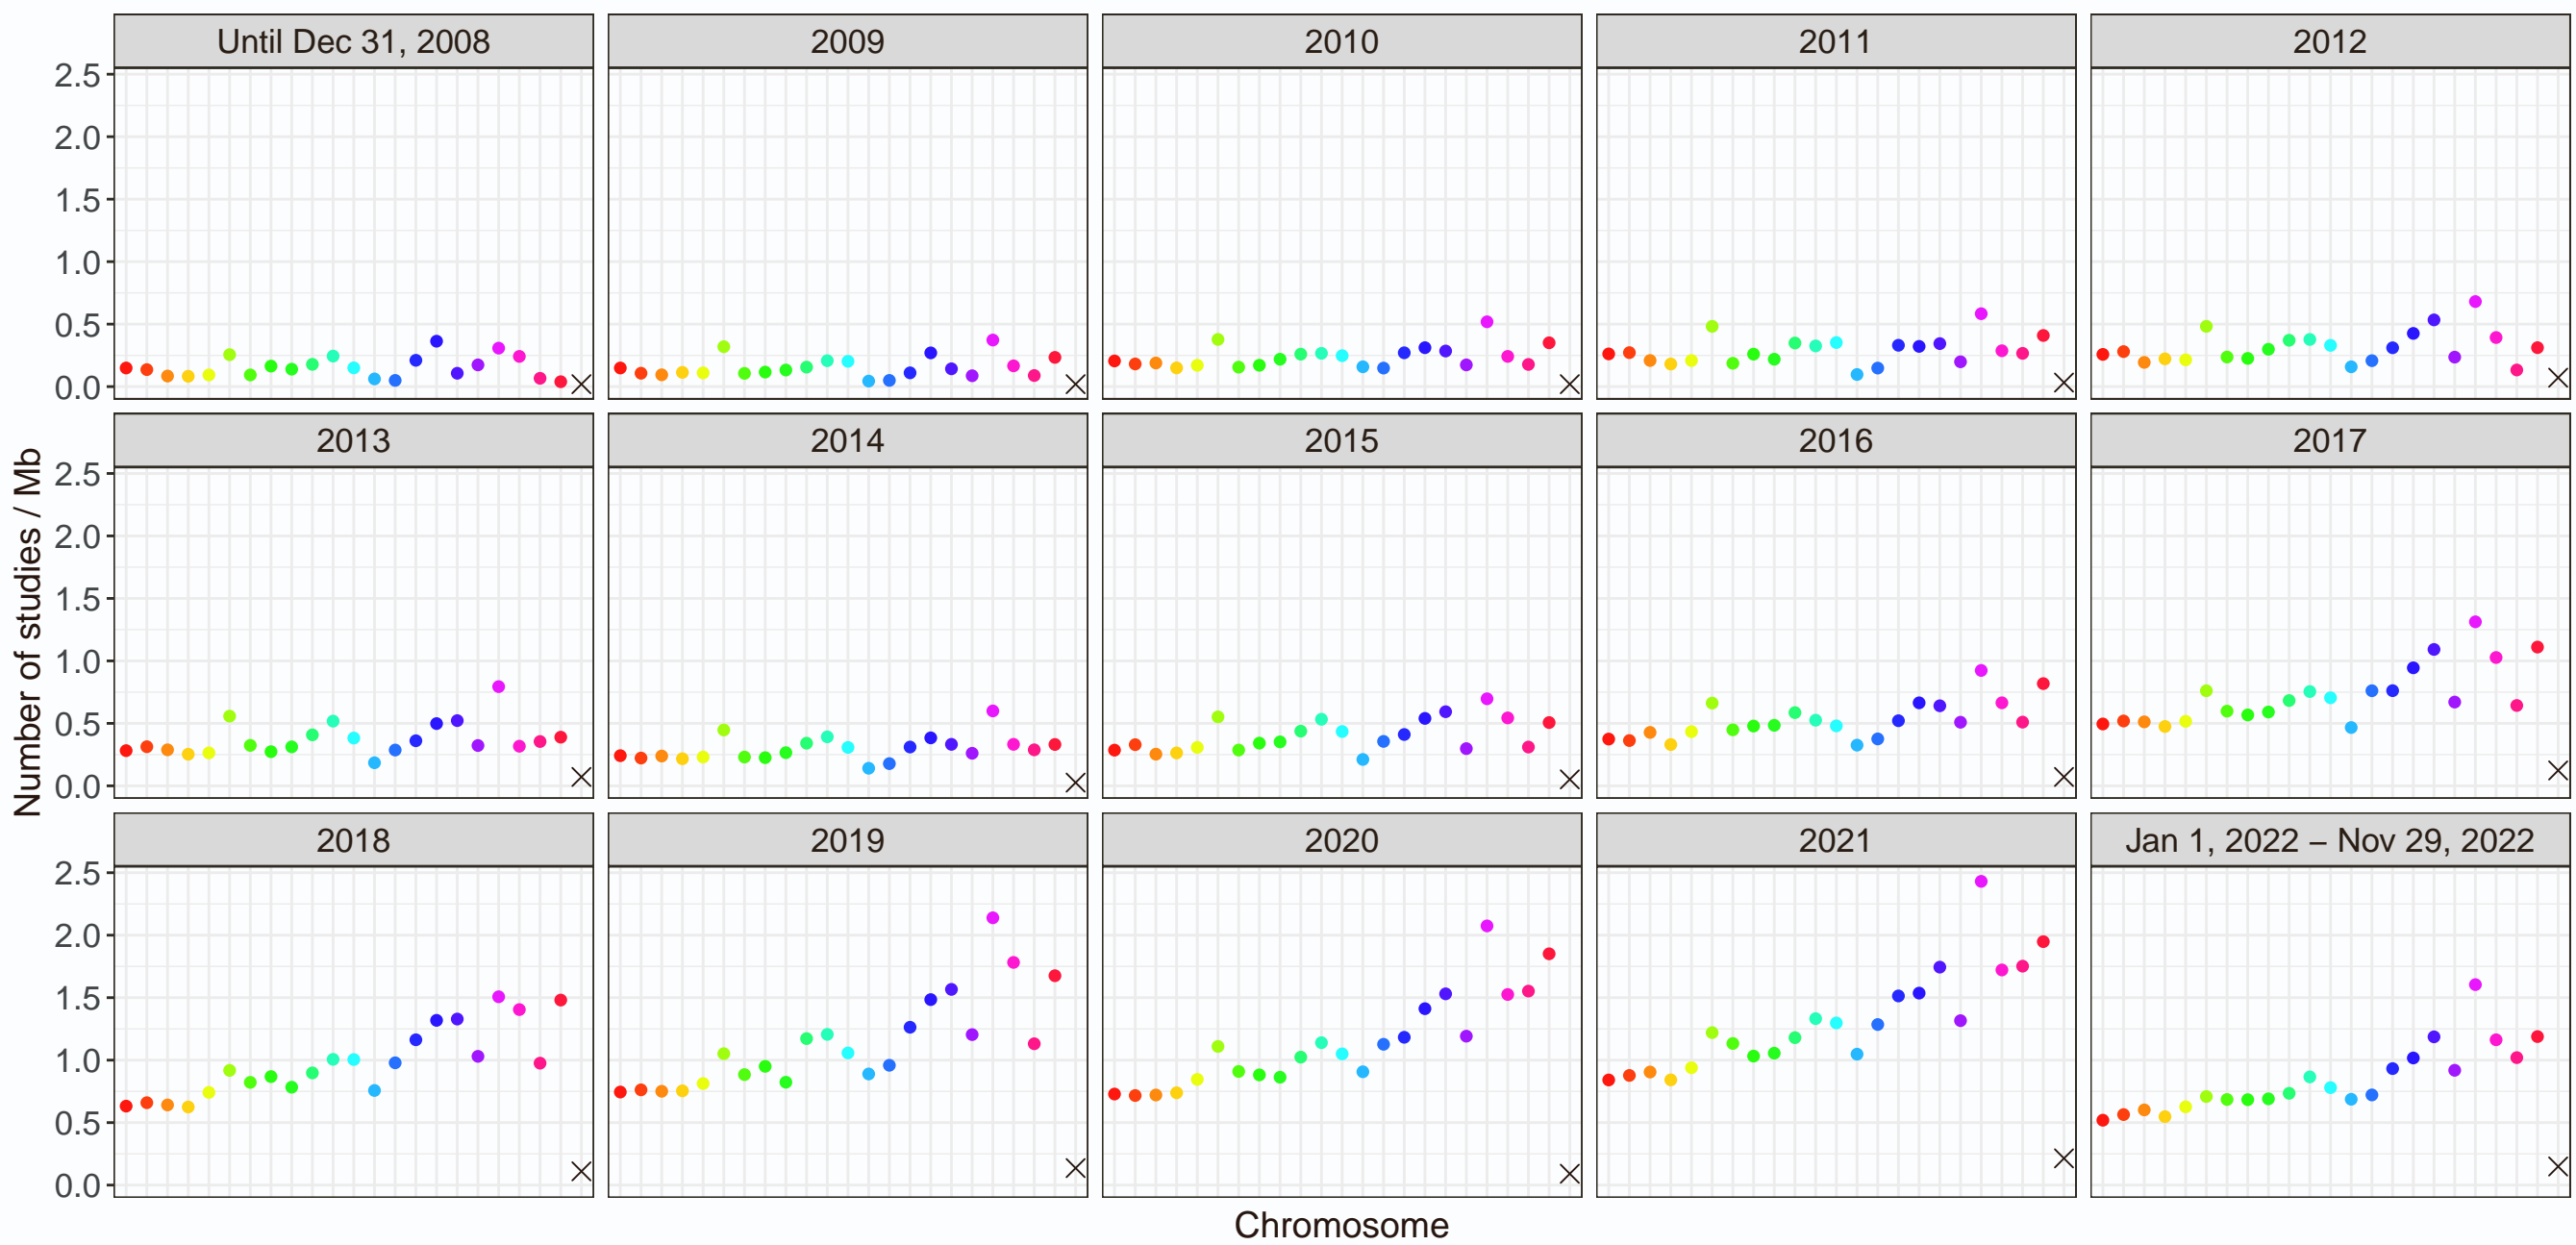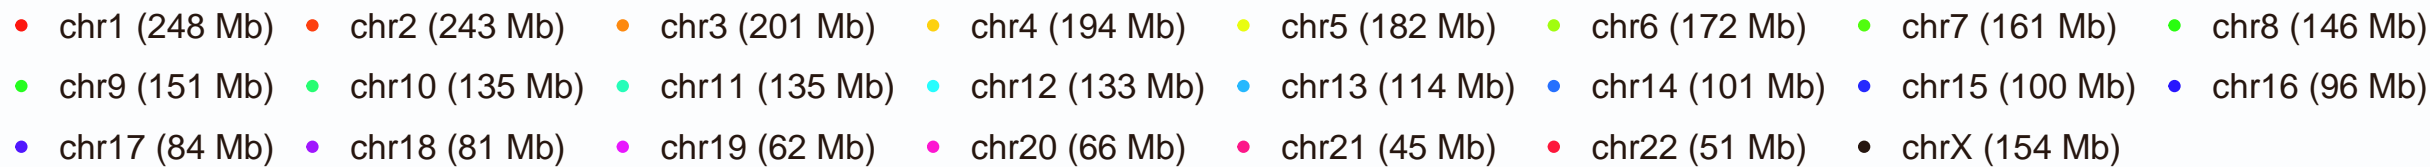

Supplement: mmc1.pdf [file mmc1.pdf]
